# Supplementary material for: The suitability of laboratory-bred Anopheles cracens for the production of Plasmodium vivax sporozoites
Source: Malar J. 2015 Aug 12;14:312. doi: 10.1186/s12936-015-0830-0 (PMC4531391; doi:10.1186/s12936-015-0830-0)
Supplement: Additional file 1: — Raw data on mosquito’s infections and sporozoites production. This file shows the original data analysed and displayed in the graphs in the present manuscript. [file 12936_2015_830_MOESM1_ESM.xlsx]

## Sheet: Supplementary Table 1
Blood Sample No	Colletction Date	Patient Sex	Patient Age (years)	Asexual Parasites per µl	Gametocytes per µl	Mosquitoes fed (n)	Mosquitoes positive for oocysts/ dissected (n/n)	Surviving Mosquito for salivary gland dissection (n)	Mosquito survival rate (%)	Total number of sporozoites	Sporozoites per mosquito
1	2013-05-13	F	32	5504	192	50	3/3	41	82	1336000	32585.4
2	2013-05-14	M	38	30772	2912	260	3/5	225	86.5385	328235	1458.82
3	2013-06-28	F	35	8096	1376	88	7/7	13	14.7727	137813	10601
4	2013-07-03	F	34	13188	256	23	0/4	-	-	-	-
5	2013-08-13	F	18	1056	256	94	3/3	36	38.2979	1700000	47222.2
6	2013-08-13	F	15	704	1024	70	0/10	-	-	-	-
7	2013-08-14	F	15	17584	416	62	0/4	-	-	-	-
8	2013-09-13	M	20	1824	544	143	0/22	-	-	-	-
9	2013-09-13	M	28	768	2560	110	0/8	-	-	-	-
10	2013-09-16	M	27	2016	512	159	3/3	61	38.3648	30000	491.803
11	2013-09-16	M	53	21980	2304	72	2/3	19	26.3889	7000	368.421
12	2013-09-16	M	11	3104	384	144	2/3	48	33.3333	279000	5812.5
13	2013-09-16	M	18	17584	128	54	0/3	-	-	-	-
14	2013-09-17	F	13	1536	64	92	3/3	48	52.1739	750000	15625
15	2013-09-17	M	35	21980	256	48	2/3	28	58.3333	310000	11071.4
16	2013-09-17	M	15	3424	352	55	3/3	40	72.7273	1120000	28000
17	2013-09-18	F	42	13188	288	120	0/8	-	-	-	-
18	2013-10-02	M	43	21980	48	54	0/3	-	-	-	-
19	2013-10-02	M	19	5120	1024	70	0/10	-	-	-	-
20	2013-11-19	M	29	1920	448	212	3/3	87	41.0377	1070000	12298.9
21	2013-11-20	F	20	13188	640	200	1/3	103	51.5	4200000	40776.7
22	2013-11-21	M	45	21980	816	134	3/3	67	50	22000	328.358
23	2013-11-21	M	15	1376	64	200	0/4	-	-	-	-
24	2013-11-22	M	57	5184	1344	187	3/3	87	46.5241	6900000	79310.3
25	2013-11-22	F	26	2544	96	64	2/3	45	70.3125	1680000	37333.3
26	2014-01-14	M	36	17584	256	82	3/3	32	39.0244	1200000	37500
27	2014-01-14	M	8	17584	320	85	0/4	-	-	-	-
28	2014-01-15	M	28	3328	128	134	3/3	45	33.5821	221000	4911.11
29	2014-01-16	F	37	4448	384	122	3/3	23	18.8525	250000	10869.6
30	2014-01-17	M	50	10048	5312	145	3/3	39	26.8966	20000	512.821
31	2014-01-18	M	13	13188	3616	207	0/4	-	-	-	-
32	2014-02-13	M	13	39564	1360	221	3/3	87	39.3665	2990332	34371.6
33	2014-02-13	M	27	6720	32	175	0/4	-	-	-	-
34	2014-02-14	M	46	17584	1360	110	0/4	-	-	-	-
35	2014-02-14	M	15	43960	448	67	0/3	-	-	-	-
36	2014-02-15	F	15	17584	288	56	4/4	26	46.4286	573332	22051.2
37	2014-02-17	F	5	21980	448	101	3/3	38	37.6238	2963666	77991.2
38	2014-03-10	M	14	8792	448	122	3/3	69	56.5574	2182000	31623.2
39	2014-04-11	M	18	57148	5280	192	0/3	-	-	-	-
40	2014-04-15	M	48	13188	736	223	4/5	73	32.7354	1420000	19452.1
41	2014-04-23	F	19	13188	512	156	3/3	25	16.0256	612000	24480
42	2014-04-25	M	34	4864	2368	138	2/3	30	21.7391	1260000	42000
43	2014-06-16	M	20	13188	336	266	3/3	80	30.0752	300000	3750
44	2014-06-16	M	16	39564	128	100	3/3	88	88	590000	6704.55
45	2014-06-16	M	15	8480	720	200	3/3	102	51	5700000	55882.4
46	2014-06-20	M	9	13188	256	178	0/4	-	-	-	-
47	2014-06-23	M	25	17584	640	206	4/4	138	66.9903	4000000	28985.5
48	2014-06-27	F	41	384	128	223	3/3	190	85.2018	900000	4736.84
49	2014-07-02	F	22	26376	896	140	3/3	77	55	2054000	26675.3
50	2014-07-14	M	20	1744	192	117	3/3	58	49.5726	612000	10551.7
51	2014-07-15	F	28	1888	176	53	3/3	27	50.9434	1995000	73888.9
52	2014-10-07	M	17	4576	768	459	5/5	300	65.3595	18243240	60810.8
53	2014-11-24	M	12	5952	704	173	3/3	152	87.8613	1842500	12121.7
54	2014-12-01	M	14	30772	1056	328	3/3	267	81.4024	7795000	29194.8
55	2014-12-02	M	17	3200	64	287	3/3	264	91.9861	13177500	49914.8
